This work was assessed during the iGEM/PLOS Realtime Peer Review Jamboree on 23<sup>rd</sup> February 2018 and has been revised in response to the reviewer's comments. A transcript of these comments is available with the original article as a supplementary file.

## Characterizing Genetic Circuit Components in *E. coli* towards a *Campylobacter jejuni* Biosensor.

Natalia Brzozowska (1)\*, Jane Gourlay (1), Ailish O'Sullivan (1), Frazer Buchanan (1), Ross Hannah (1), Alison Stewart (1), Hannah Taylor (1), Reuben Docea (1), Greig McLay (1), Ambra Giuliano (1), James Provan (1), Katherine Baker (1), Jumai Abioye (1), Julien Reboud (1), Sean Colloms (1)

1. University of Glasgow, Glasgow, United Kingdom.

\*Corresponding author: Natalia Brzozowska ([nbrzozowska96@gmail.com](mailto:nbrzozowska96@gmail.com))

### Author contributions

Conceptualization: Natalia Brzozowska, Jane Gourlay, Ailish O'Sullivan, Frazer Buchanan, Ross Hannah, Alison Stewart, Hannah Taylor, Reuben Docea, Greig McLay, Ambra Guiliano

Methodology: Natalia Brzozowska, Jane Gourlay, James Provan

Investigation: Natalia Brzozowska, Jane Gourlay, Ailish O'Sullivan, Frazer Buchanan, Ross Hannah, Alison Stewart, Hannah Taylor

Writing – Original Draft Preparation: Natalia Brzozowska, Katherine Baker

Writing – Review and Editing: Natalia Brzozowska, James Provan

Resources: Sean Colloms, James Provan

Funding Acquisition: Sean Colloms, Julien Reboud

Supervision: Sean Colloms, Julien Reboud, James Provan, Katherine Baker, Jumai Abioye

Visualization: Natalia Brzozowska, Katherine Baker, James Provan, Jane Gourlay, Ailish O'Sullivan

---

### Abstract

*Campylobacter jejuni* is responsible for most cases of bacterial gastroenteritis (food poisoning) in the United Kingdom. The most common routes of transmission are by contact with raw poultry. Current detection systems for the pathogen are time-

consuming, expensive or inaccessible for everyday users. In this article we propose a cheaper and faster system for detection of *C. jejuni* using a synthetic biology approach. We aimed to detect *C. jejuni* by the presence of xylulose, an uncommon bacterial capsular saccharide. We characterized two sugar-based regulatory systems that displayed potential to act as tools for detection of xylulose. Using a two-plasmid reporter system in *Escherichia coli*, we investigated the regulatory protein component (MtlR) of the mannitol operon from *Pseudomonas fluorescens*. Our findings suggest that the promoter of *mtlE* is activated by MtlR in the presence of a variety of sugar inducer molecules, and may exhibit cross-activity with a native regulator of *E. coli*. Additionally, we engineered the L-arabinose transcriptional activator (AraC) of *E. coli* for altered ligand specificity. We performed site-specific saturation mutagenesis to generate AraC variants with altered effector specificity, with an aim to generate a mutant activated by xylulose. We characterized several mutant AraC variants which have lost the ability to respond specifically to the native L-arabinose effector. We promote this technique as a powerful tool for future iGEM teams to create regulatory circuits activated by novel small molecule ligands.

## Financial Disclosure

The project was funded by the University of Glasgow, the Wellcome Trust, the Biotechnology and Biological Sciences Research Council (BBSRC), The Microbiology Society, the Institution of Mechanical Engineers (iMechE), and the Society for Experimental Biology (SEB). BMG LabTech UK, Eppendorf UK, and New England Biolabs donated equipment and consumables; IDT provided free DNA synthesis. The funders had no role in study design, data collection and analysis, decision to publish, or preparation of the manuscript.

## Competing Interests

The authors have declared that no competing interests exist.

## Ethics Statement

N/A

## Data Availability

Yes – all data are fully available without restriction. All relevant data are within the paper and relevant Supporting information files.

## Introduction

*Campylobacter jejuni* is a Gram-negative, microaerophilic, corkscrew-shaped bacteria which has been implicated as being one of the most common causes of human gastroenteritis worldwide [1][2][3]. Infection with *C. jejuni* causes common symptoms such as diarrhoea, abdominal pain, fever, headache, nausea and vomiting [3]. *C. jejuni* is harboured by poultry, though it has been reported in other meat products, raw milk, and in untreated drinking water [3]. The high prevalence of *C. jejuni* makes it an interesting target for synthetic biology-based solutions.

Traditional methods for detection of *C. jejuni* include culture-based techniques, which are relatively cheap to perform and require less training than other methods [4]. However, they are incredibly time and labour intensive and therefore, in recent years, a move has been made towards use of rapid detection testing [5]. Such techniques include enzyme immunoassay and lateral flow systems, which require only one to two hours to give a result [6]. However, use of these methods requires highly trained employees, and so detection of *C. jejuni* in an industrial or agricultural setting would require outsourcing to specialists. In addition, a comparison of three rapid detection systems demonstrated a high number of false negative results, which is a drawback when considering detection of *C. jejuni* to reduce the incidence of disease outbreaks [7].

To reduce incidences of food poisoning by *C. jejuni*, and to improve upon current methods of detection, we decided to create a biosensor that was able to detect the presence of *C. jejuni* quickly and accurately. We envisaged a two-part biosensor that would specifically require two sensory inputs associated with *C. jejuni* to report a reliable result. The first molecule we identified as a marker for *C. jejuni* was autoinducer-2 (AI-2) [9]. AI-2 is a secreted quorum-sensing molecule. However, many varied gram-positive and gram-negative bacterial species sense their population density and surrounding bacterial environment using this molecule [10]. On the other hand, this ubiquity meant that AI-2 gene regulation was well characterised, with prior iGEM teams having worked on the *E. coli* AI-2 quorum sensing regulatory system

[11][12]. Therefore, we searched for another marker with greater specificity to *C. jejuni* to use in tandem with AI-2.

Xylulose is a rare sugar found incorporated within the polysaccharide capsule of *C. jejuni* [8]. The presence of xylulose is uncommon in bacterial polysaccharide capsules [8]. Additionally, the glycosidic bonds which incorporate xylulose were found to be extremely acid-labile [8], providing a possibility to release the molecule from the capsule and allow for whole-cell based detection. For the detection of xylulose two possible avenues were explored. One exploits the mannitol metabolism operon of *Pseudomonas fluorescens* [13]. It has been previously reported that xylulose acts as a direct inducer of the regulatory protein MtlR, activating transcription from the  $p_{mtlE}$  promoter [14]. To investigate its suitability for biosensor, we characterized the  $p_{mtlE}$ /MtlR regulatory system in *E. coli*.

Use of a gene regulatory system outside the context of the native organism may be problematic. For this reason, we aimed to construct an alternative xylulose sensor, by exploiting components of the L-arabinose operon, native to *E. coli* [15]. Several previous studies have shown that its regulatory protein, AraC, can be engineered to activate transcription in response to non-native small molecules [16][17][18]. Site-saturation mutagenesis of residues positioned within the ligand-binding pocket of AraC (Fig 1), coupled with fluorescence-based cell sorting, allowed isolation of AraC variants with altered effector specificity [16]. Based on these findings we aimed to use multiple site-saturation mutagenesis and fluorescence-based screening to generate mutant AraC responsive specifically to xylulose.

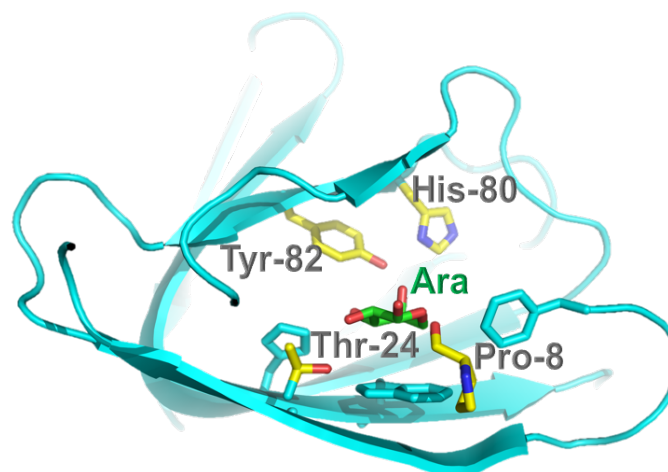

**Fig 1. Crystal structure of AraC binding pocket with bound L-arabinose (Ara).** The four key residues which are important for ligand binding pocket are indicated. Structure was generated using PyMOL.

## Materials and Methods

### Standard molecular biology techniques.

All protocols used during this work, including a standardised set for routine laboratory techniques, are detailed in S3 File. All ligation reactions described herein were transformed into DH5 $\alpha$  commercial chemically competent *E. coli* cells, plated on L-agar containing the required antibiotics, and grown at 37°C overnight. All plasmid constructs herein were verified by diagnostic restriction digest and DNA sequencing prior to use or further subcloning.

### Plasmid design for expression of p<sub>mtlE</sub>/MtlR regulatory system

All plasmids were constructed using BioBrick Standard Assembly. The biobrick p<sub>tet</sub> promoter (R0040) followed by a medium-strength ribosome binding site (RBS) B0032 was ordered for synthesis by Integrated DNA Technologies (IDT) as complementary oligos, that were annealed and ligated into a pSB1C3 plasmid backbone. *mtlR* coding sequence was ordered as a gBlock Gene Fragment by IDT and inserted behind the R0040+B0032 promoter/RBS part in pSB1C3. This produced the regulatory plasmid BBa\_K2442202 (Fig 2).

The sequence of the p<sub>mtlE</sub> promoter with its native RBS was obtained from Liu *et al.* (2015) [14] and supplied as oligo by IDT. A reporter plasmid was constructed by ligating GFP coding sequence (BBa\_E0040; obtained from iGEM Distribution Kit) downstream of the p<sub>mtlE</sub> promoter into pSB1C3 backbone. The resulting plasmid BBa\_K2442206 is shown in Fig 2.

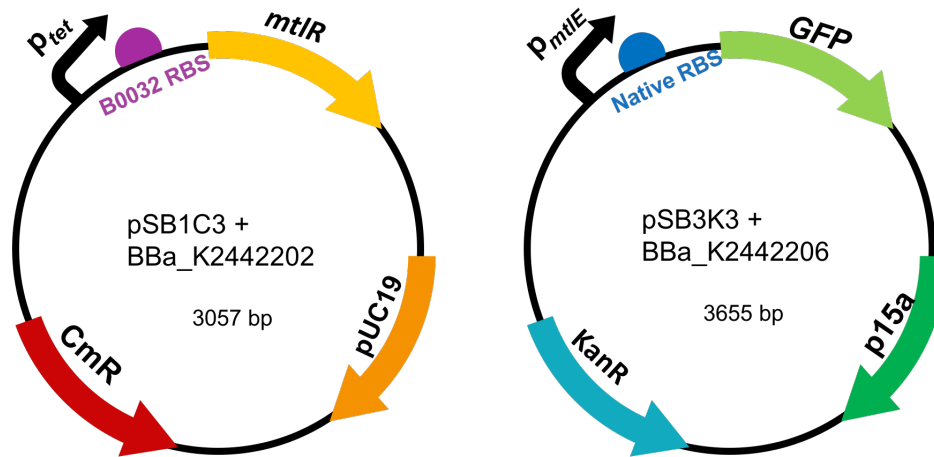

**Fig 2. Diagrams of the regulatory plasmid (left) and GFP reporter plasmid (right) for the expression of the *MtlR*/*p<sub>mtIE</sub>* regulatory system.**

## Plasmid design for expression of *p<sub>BAD</sub>*/*AraC* regulatory system

Fragments containing parts R0011 (*LacI*-regulated promoter) upstream of ribosome-binding site (RBS) B0032 were synthesised by IDT as oligonucleotides. Wild type *araC* sequence as described by Miyada *et al.* (1980) [19] was amplified from BBa\_I0500 using primers *araC\_BBPre\_F* and *araC\_BB Suf\_R* (Table 1) to introduce BioBrick prefix and suffix to both ends of WT *araC*. The PCR product was subsequently inserted downstream of R0011 promoter and B0032 RBS in pSB1C3 backbone to generate the regulatory plasmid BB\_K2442104 (Fig 3).

Minimal *p<sub>BAD</sub>* promoter was synthesised by IDT as a gBlock (see S1 Fig for full sequence). The fragment was ligated into pSB3k3, upstream of part BBa\_I13500 (containing B0034 RBS and GFP). This resulted in the final reporter plasmid BBa\_K2442102 (Fig 3).

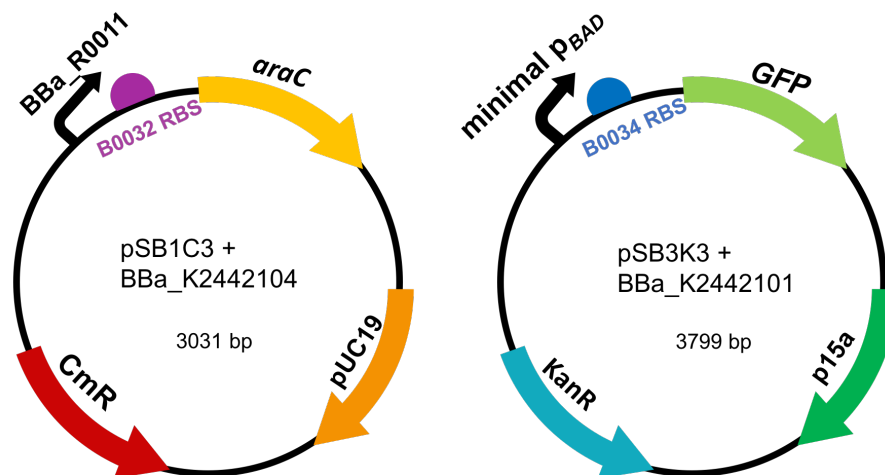

**Fig 3. Diagrams of the regulatory plasmid (left) and GFP reporter plasmid (right) for the expression of the AraC/p<sub>BAD</sub> regulatory system.**

## Mutant AraC Library Construction

Site directed mutagenesis by PCR was performed according to the protocol in S3 File. QIAQuick PCR purification of the product was performed according to the Qiagen protocol (S3 File). The purified PCR product was ligated into pSB1C3 backbone, downstream of R0011 promoter and B0032 RBS. Ligation reaction was ethanol-precipitated, and transformed into electrocompetent DH5 $\alpha$  by electroporation. This resulted in the *araC* mutant library. Colonies carrying the mutant library were washed off transformation plates with 1.5ml double distilled H<sub>2</sub>O, (ddH<sub>2</sub>O) then transferred to a 1.5ml tube. The cell pellet was centrifuged at room temperature, the supernatant was then discarded and pellet resuspended in 1.5ml ddH<sub>2</sub>O. This centrifugation-resuspension step was repeated 3 times to remove agar plate debris. Plasmid DNA was extracted using the Qiagen Plasmid MiniPrep Kit with 2 of each PB buffer and PE buffer wash steps to ensure maximum extract purity. Sequencing primer VF2 was then added and sample sent for sequencing.

## Characterization of the p<sub>mttE</sub>/MtlR system activity in *E. coli*

To characterize activity of the p<sub>mttE</sub>/MtlR in *E. coli*, we studied the levels of GFP fluorescence using a 96 well plate in the FLUOstar Omega plate reader (BMG Labtech). Each strain was grown to saturation in an overnight culture of LB with



appropriate antibiotics for the relevant plasmids (chloramphenicol and kanamycin). Then the culture was diluted 1:100 with fresh LB+antibiotic and placed into a black bottomed 96 well plate. All readings were performed in the plate reader at 37°C shaking at 200 RPM. GFP fluorescence was measured (excitation at 485nm and emission at 530nm) every hour for 8 hours.

## Mutant Screening

Plasmid DNA containing the *araC* mutant libraries were transformed into DS941 strain *E. coli* carrying the reporter plasmid K2442102 (in pSB3K3 vector). Transformants were plated on LB agar medium containing chloramphenicol plus kanamycin (to select for K2442102 and K2442104) plus one of the tested inducers: arabinose, xylose or decanal. Concentrations were 40mM for arabinose and xylose and 2mM for decanal. As a control test, transformants were also plated on LB medium containing chloramphenicol and kanamycin only. Fluorescence images of the conditional transformation plates were obtained using a GE-Healthcare Typhoon FLA-9500 laser scanner. Excitation was recorded at 473nm, emission was recorded using 520-540nm filter. Colonies which exhibited fluorescence were observed as dark colonies on the scan. Out of those which appeared dark on xylose or decanal plates, 200 were replica short-streaked onto plates containing xylose, arabinose, decanal, or no additive. Each colony of interest was picked and then immediately short-streaked onto each new condition plate using the same toothpick, into the same position using grids. This method of replica plating ensures the plates can later be aligned and short streaks of the same origin directly compared between the plates. After overnight incubation at 37°C, fluorescence scans of each plate were again obtained using the laser scanner.

## Liquid culture fluorescence assay for AraC mutants

Colonies of interest were inoculated into L-broth containing chloramphenicol and kanamycin. Each liquid culture was grown overnight at 37°C, shaking at 225 rpm. The following day the culture was diluted 1:100 into fresh L-broth containing the above antibiotics plus one of the following inducer conditions:

- 40mM xylose
- 40mM arabinose



- 2mM decanal

200 $\mu$ l of each culture to be tested was placed in a well of a clear-based 6-well plate, then incubated at 37°C shaking at 300 rpm for 12 hours in a BMG FLUOstar Omega fluorescence plate reader. GFP fluorescence of each culture was measured at 1 hour time intervals for the duration of the culture experiment, using excitation wavelength 485nm and emission wavelength 530nm. Cell growth was simultaneously tracked by measuring optical density at 600nm.

## Results

### $P_{mtlE}$ is regulated by MtlR and other native regulatory proteins in *E. coli*

From the literature, we identified a regulatory system that responds to xylulose - the mannitol-inducible promoter from *P. fluorescens* and its regulatory protein MtlR [14]. To utilize these parts in our dual-input biosensor, their activity needed to be characterized in *E. coli*. Two constructs were assembled: the regulatory plasmid with a constitutively active  $p_{tet}$  promoter driving expression of the MtlR protein, and the reporter plasmid containing  $p_{mtlE}$  promoter regulating expression of GFP (Fig 1).

To test whether MtlR can activate  $p_{mtlE}$  in *E. coli*, we measured GFP fluorescence in *E. coli* carrying the reporter plasmid alone, or both the regulatory and reporter plasmids. The experiment was done in presence of 6 structurally similar sugars (ribose, fructose, xylose, mannitol, arabinose and sorbitol) [14], to investigate substrate specificity of MtlR. Xylulose itself was not tested due to budgetary constraints. Fluorescence levels were compared to basal fluorescence levels of DH5 $\alpha$  cells, not expressing either plasmid. Cells expressing the reporter plasmid alone showed higher levels of fluorescence than empty cells, in presence of all sugars tested (Fig 4 and S1 File). This suggests that  $P_{mtlE}$  may interact with native *E. coli* proteins. GFP fluorescence levels further increased in cells expressing both MtlR and the reporter plasmid (Fig 4 and S1 File). This supports previous findings that MtlR functions as an activator of  $p_{mtlE}$  in *E. coli*. Although we were unable to test xylulose, we found that  $p_{mtlE}$  was induced in presence of a number of structurally similar sugars,

showing highest response to ribose and sorbitol (Fig 4 and S1 File). We conclude that  $p_{mtlE}$  promoter functions in *E. coli*, and MtlR acts as its activator. However, the *P. fluorescens*  $p_{mtlE}$  promoter is not strictly regulated by MtlR when expressed in *E. coli*.

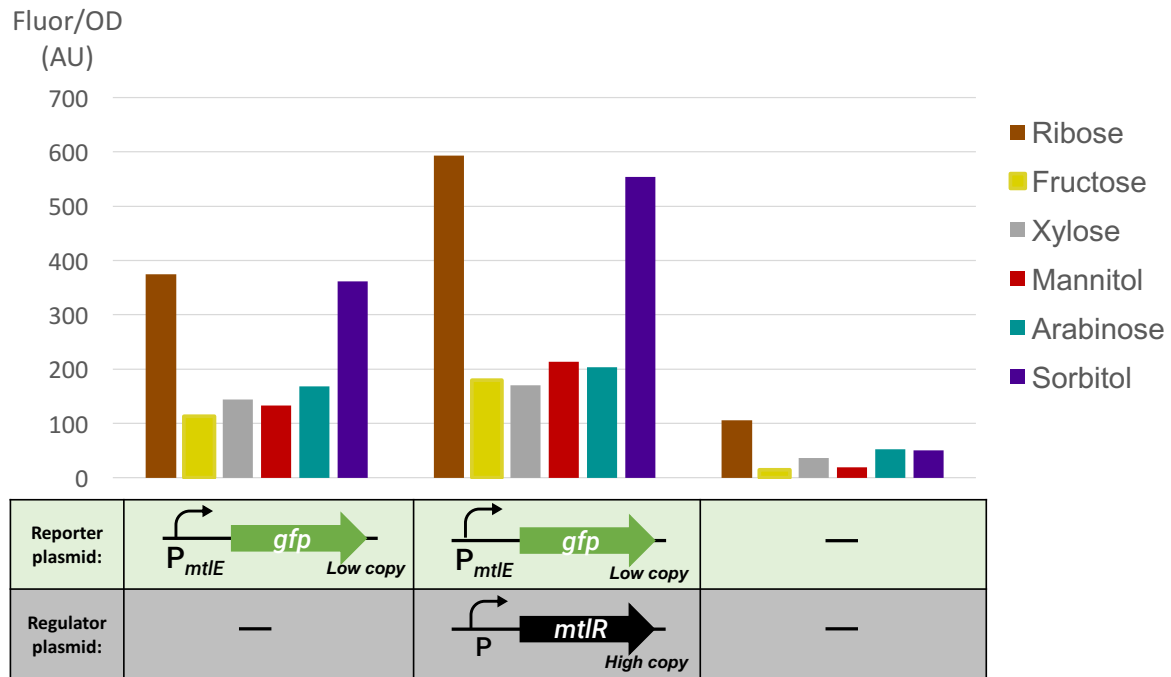

**Figure 4. Activity of  $p_{mtlE}$ /MtlR reporter circuit in *E. coli*.** Average relative fluorescence over optical density at hour 8. Shows fluorescence levels in presence of each sugar tested (as specified). The cells were expressing either reporter plasmid BBa\_K2442206 alone, both reporter and regulatory plasmid BBa\_K2442202, or neither (as specified). Low copy; PSB1C3 plasmid vector. High copy; PSB3k3 plasmid vector. *E. coli* strain is DH5 $\alpha$ .  $n=1$ .

## Split regulatory components of the L-arabinose operon from *E. coli* are functional and can be used for construction of L-arabinose-inducible systems

As the *P. fluorescens* MtlR regulatory system lacked specificity in *E. coli*, we aimed to utilize components of the L-arabinose operon from *E. coli* to generate a new tightly controlled xylulose-regulatory system. We chose to mutagenize the AraC protein to change its effector specificity, based on previous reports of successful engineering of AraC to respond to non-native inducers [16][17][18]. The  $p_{BAD}$  promoter is regulated by the AraC transcriptional regulator, which drives expression from  $p_{BAD}$  only in presence of L-arabinose [15]. In nature the  $p_{BAD}$  promoter overlaps with the *araC*

coding region [20]. To allow for mutagenesis, we split *araC* from  $p_{BAD}$ . The minimal  $p_{BAD}$  was designed to retain all the sites required for AraC binding. The start codon of *araC* within  $p_{BAD}$  has been changed from ATG→AGT (S1 Fig).

To test activity of minimal  $p_{BAD}$ , we expressed regulatory and reporter plasmids in AraC-negative *E. coli* strain DS941 and plated the cells on LB medium. GFP fluorescence measurements demonstrated that AraC expressed from a separate plasmid can induce expression from minimal  $p_{BAD}$  upon binding of arabinose, as cells exhibited fluorescence only in presence of arabinose (Fig 5 and S2 File). GFP fluorescence measurements revealed that minimal  $p_{BAD}$  is inducible by L-arabinose 300-fold (Fig 5 and S2 File), showing improvement over previously characterized  $p_{BAD}$  parts. The minimal  $p_{BAD}$  promoter is tightly regulated by AraC expressed either from our regulatory plasmid, or from bacterial chromosome.

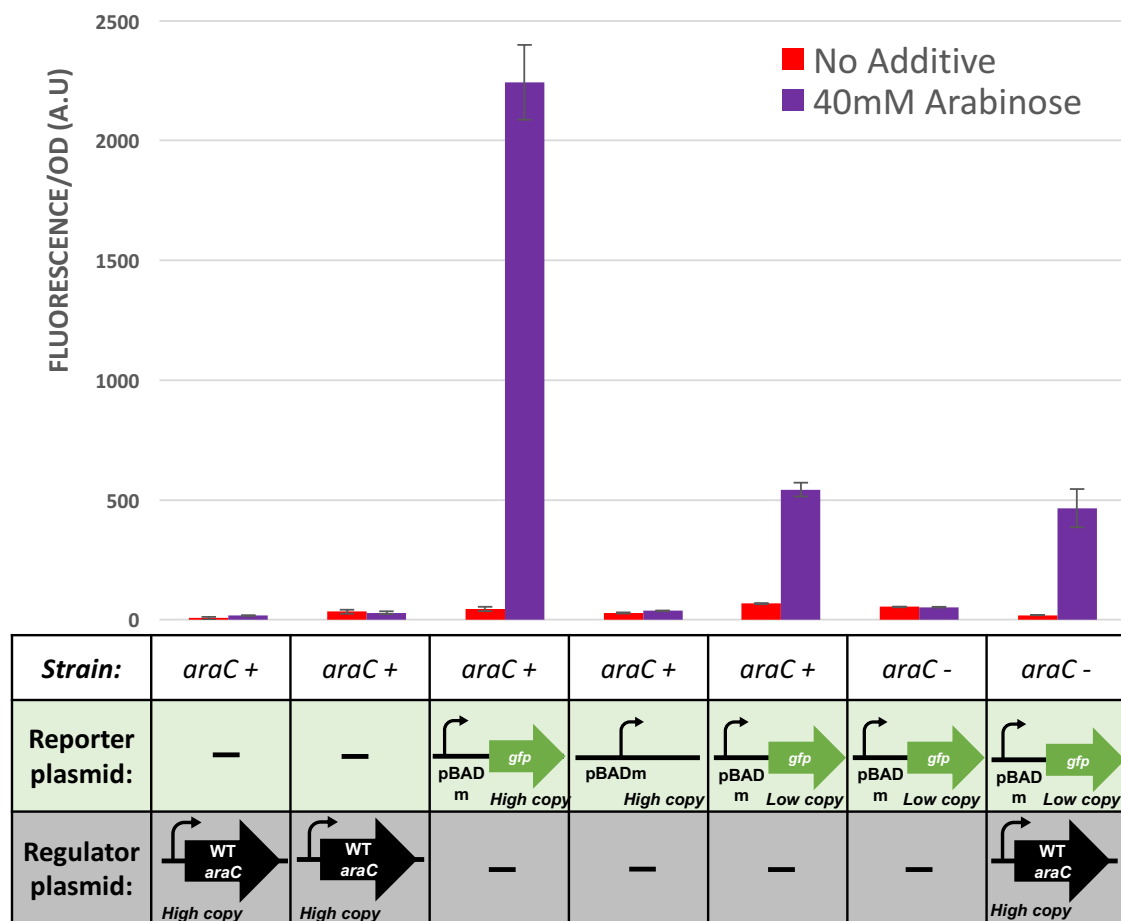

**Figure 5. Activity of split *araC* and  $P_{BAD}$  fluorescence circuits in *E. coli*.** Average relative fluorescence over optical density at hour 8. Shows fluorescence levels under no additive and 40mM Arabinose. *E. coli* strains which the plasmids were transformed into are DS941(*araC*-) or DH5 $\alpha$  (*araC*+). Cells were expressing either regulatory construct BBa\_K2442104, reporter construct BBa\_K2442102, both, or neither (as specified). Low copy; PSB1C3 plasmid vector. High copy; PSB3k3 plasmid vector. Error bars are standard deviation;  $n=3$

## Site-directed mutagenesis of the AraC protein provides a tool to develop biosensors responsive to non-native molecules

We performed site-directed saturation mutagenesis of the *araC* gene, targeting four amino acids within the L-arabinose binding pocket of AraC. The protocol successfully generated a mutant library of ~24,000 AraC variants. Sequencing confirmed that NNS mutations were introduced at correct codon positions (residues 8, 24, 80 and 82; Fig 6). *E. coli* DS941 transformed with the mutant library and reporter plasmids were screened for GFP fluorescence in presence of 3 different inducer molecules that were available to us, to identify colonies with altered AraC/ $p_{BAD}$  activity. Due to prohibitive cost, we were unable to test xylulose. Nevertheless, 4 colonies displaying altered expression patterns were identified and subsequently characterized (Fig 7 and S2 File). Two AraC mutants constitutively activated  $p_{BAD}$ , without the requirement for L-arabinose. The other two had lost the ability to respond to arabinose. Potentially, the latter two variants could be responsive to a yet unidentified compound.

## A: Residues 5-28

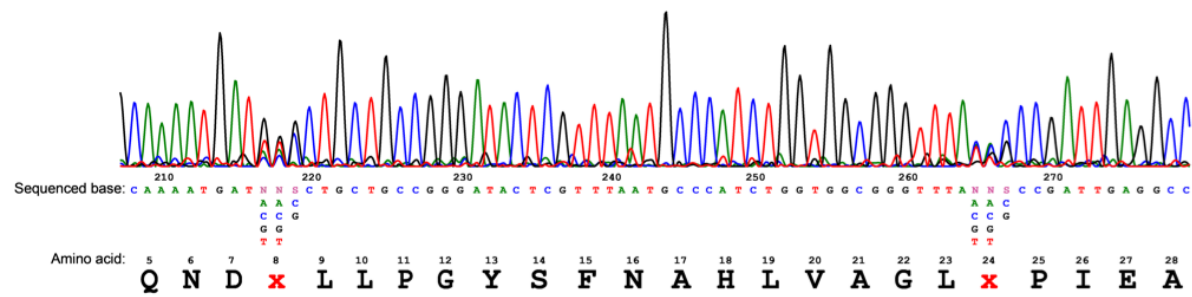

## B: Residues 70-92

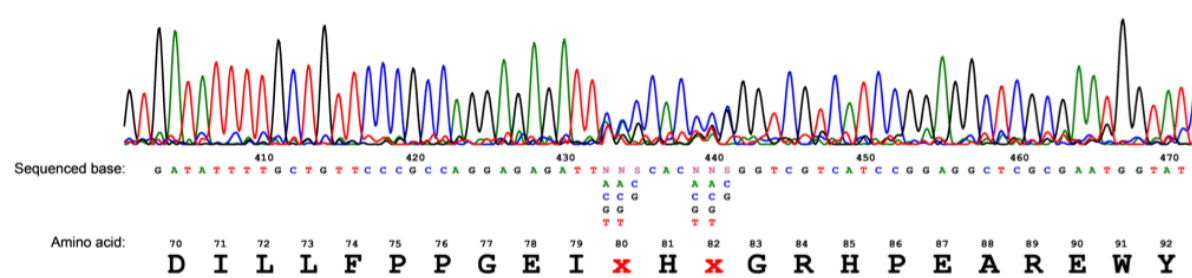

**Figure 6. Sequencing trace from mutant library MiniPrep.** Figure shows NNS mutations introduced at residues 8, 24, 80 and 82. N; any base. S; strong base (C or G).

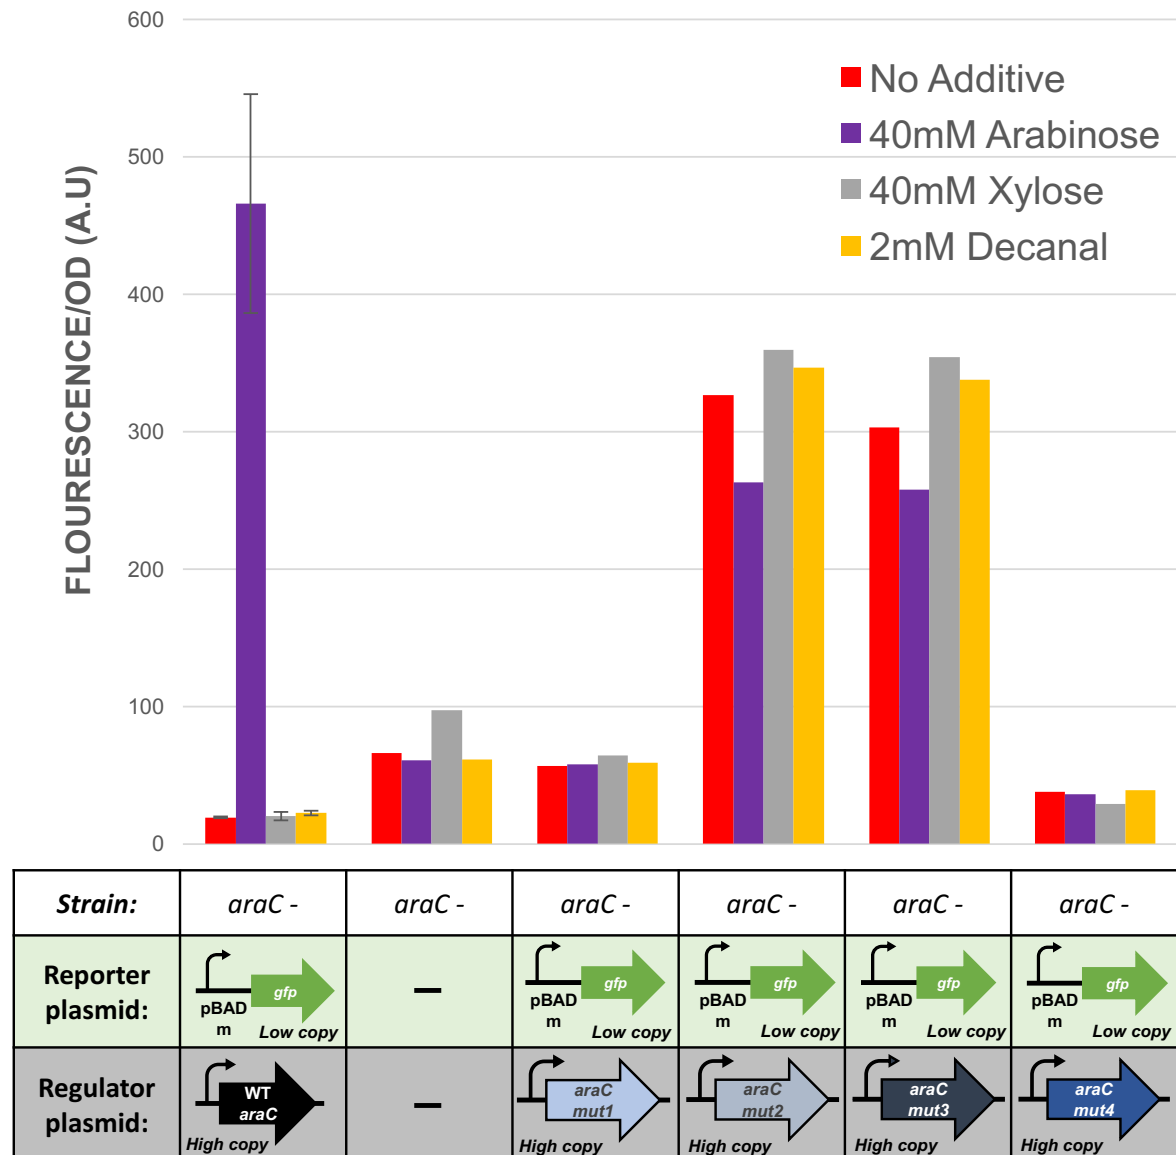

**Figure 7. Activity of AraC mutants compared to WT AraC.** Average relative fluorescence over optical density at hour 8. Shows fluorescence levels under no additive, 40mM Arabinose, 40mM xylose and 2mM decanal. *E. coli* strain which the plasmids were transformed into is DS941 (*araC* -). Cells were expressing the reporter plasmid and regulatory plasmid with wild type (WT) or mutant (*mut1*-*mut4*) variant of AraC (as specified). Empty cells served as control. Low copy; PSB1C3 plasmid vector. High copy; PSB3k3 plasmid vector. For WT AraC (lane 1) error bars are standard deviation;  $n=3$ . For all other samples (lanes 2-6):  $n=1$ .

The 4 mutant plasmids were sequenced. Wild-type AraC possesses proline at residue 8, threonine at residue 24, histidine at 80 and tyrosine at 82. Mutant 1 (BBa\_K2442105) has the following mutations: proline-8→glycine (P8G), histidine-80→proline (H80P) and tyrosine-82→tryptophan (Y82W). Mutant 2 (BBa\_K2442106)

and 3 (BBa\_K2442107) both had the same mutations as follows: proline-8→serine (P8S), threonine-24→aspartic acid (T24D), histidine-80→isoleucine (H80I) and tyrosine-82→alanine (Y82A). Sequencing of mutant 4 (BBa\_K2442108) revealed a deletion within the *araC* coding region, which explains lack of AraC activity in the corresponding colonies.

## Discussion

Due to lack of cheap and rapid detection methods for *C. jejuni*, we designed a biosensor responsive to a biomarker specific to the pathogen - xylulose. In our study we characterized activity of a mannitol-responsive regulator MtlR in *E. coli*. Liu *et al.* (2015) [14] previously reported that mannitol and xylulose act as direct inducers of MtlR to activate transcription from the  $p_{mtlE}$  promoter. Our results suggest that this system is functional when expressed in *E. coli*, with MtlR activating transcription from  $p_{mtlE}$ . However, reporter expression was also induced independently of MtlR. This was achieved in presence of a variety of sugars structurally similar to mannitol and xylulose, including arabinose, fructose, xylose, ribose and sorbitol. Contradictory to how the system works in *P. fluorescens* [14], the strongest reporter expression was achieved in presence of sorbitol and ribose, rather than mannitol. Although the  $p_{mtlE}$  was previously found to be activated by sorbitol independently of MtlR [14], no response to ribose has yet been observed. We suggest that other, yet unidentified proteins naturally found in *E. coli* act as transcriptional activators of  $p_{mtlE}$ .

Although our results show an increase in fluorescence upon expression of the  $p_{mtlE}$ /MtlR components in presence of sugars, it is important to note that our testing lacked a no-inducer control. As reporter expression from  $p_{mtlE}$  was observed in absence of MtlR expression, it may be that this system is constitutively activated independently of any inducer sugar. Inclusion of such control would allow for better understanding of the system's activity in *E. coli*. Moreover, due to time constraints the experiment was only performed on only one occasion, which could impact reliability of the results. This would be improved in future experiments by increasing the number of repetitions and samples tested, to determine statistical significance of the results obtained.



As we didn't identify a natural regulatory system responsive specifically to xylulose, we performed mutagenesis of the L-arabinose-responsive protein AraC as an alternative route to detect our target sugar. To achieve this, we split the *araC* coding region from the overlapping sequence of the  $p_{BAD}$  promoter. Our results suggest that the modified  $p_{BAD}$  is functional and can be activated by AraC expressed from a separate construct. Most importantly, we demonstrated successful mutagenesis protocol of the AraC protein to generate variants with altered effector substrate specificity. However, due to time constraints, we were only able to screen 200 mutant colonies out of 24,000 colonies obtained. This is an extremely low number considering our protocol was expected to generate 160,000 mutant AraC variants with different amino acid combinations at the 4 randomised residue positions. Moreover, limited resources enabled us to test for response to a narrow range of inducer molecules. In the future, optimization of the transformation protocol to obtain enough colonies to cover the entire library, along with a larger scale mutant screening would potentially allow identification of an AraC variant responsive to xylulose. Such mutant could be utilized in a xylulose-sensing component in a *C. jejuni* biosensor. Moreover, a catalogue of AraC mutants could be utilized as a component of a biosensor toolbox, allowing for generation of genetic circuits regulated by small molecules of choice.

Although we aimed to generate a xylulose-regulated system, we were unable to test our constructs in presence of xylulose due to its prohibitive cost. Nevertheless, the sugar would be required to screen for AraC mutants responsive to xylulose. We found that xylulose isomerase enzyme is capable of converting the cheaper sugar, xylose, into xylulose [21][22]. We have considered development of a suitable expression plasmid, which in the future could be used to overexpress and purify the enzyme for production of xylulose in subsequent experiments (for full description see <http://2017.igem.org/Team:Glasgow/XyluloseBiosynthesis>).

Although xylulose is rarely found in bacterial capsules [8], potential contamination of the tested area by xylulose from other sources could lead to false positive results from our detector. For this reason, we designed our biosensor to detect two sensory inputs. Apart from xylulose, we identified autoinducer-2 (AI-2) as another marker for *C. jejuni* [9]. AI-2 is a secreted quorum sensing molecule. In future development of the biosensor components, the detectors for both xylulose and autoinducer-2 would form

two components of an AND gate that will ensure a positive result is given only when both xylulose and autoinducer-2 are present, improving specificity and accuracy of the detector (for full description see <http://2017.igem.org/Team:Glasgow/ANDGate>).

To increase efficiency of the whole-cell based biosensor, we went through several design iterations to create a device that would house the engineered bacteria to make the use of the biosensor simple and easy (for full description see [http://2017.igem.org/Team:Glasgow/Applied\\_Design](http://2017.igem.org/Team:Glasgow/Applied_Design); <http://2017.igem.org/Team:Glasgow/Hardware>).

## Conclusions

We conclude that the AraC mutagenesis protocol was successful at generating AraC variants with altered effector specificity. A larger scale mutant screen could result in identification of a xylulose-inducible AraC variant. For increased specificity, the xylulose-regulated  $p_{BAD}$ /AraC system could be combined with an AI-2-sensing construct within an AND gate, and transformed into a host bacterium to produce a dual-input biosensor tool for rapid detection of *C. jejuni*.

## Acknowledgements

We would like to thank Dr. Steven Kane for helping with the design of the minimal  $p_{BAD}$  promoter. We acknowledge Dr. Paul Everest for providing information about *C. jejuni*, Dr. Richard Daniel for donating a sample of *Bacillus subtilis* for use in our project and advice on how to work with the bacterium. We also thank Ruiyang He for his work on the AND gate subproject. We are also grateful to everyone who kindly supported us on our crowdfunding page.

## References

1. Albrecht T, Baron S (1996) Medical microbiology. Galveston, Tex.: University of Texas Medical Branch at Galveston, Dept. of Microbiology & Immunology.
2. Ryan K, Ray C, Sherris J (2004) Sherris medical microbiology. New York: McGraw-Hill.

3. Campylobacter (2018). World Health Organization. Available: <http://www.who.int/mediacentre/factsheets/fs255/en/>. Accessed 30 October 2017.
4. Corry J, Post D, Colin P, Laisney M (1995) Culture media for the isolation of campylobacters. *International Journal of Food Microbiology* 26: 43-76. doi:10.1016/0168-1605(95)00044-k.
5. rapidmicrobiology » Campylobacter Detection and Identification Methods (2018). Rapidmicrobiologycom. Available: <http://www.rapidmicrobiology.com/test-method/campylobacter-detection-and-identification-methods/>. Accessed 30 October 2017
6. Giltner C, Saeki S, Bobenchik A, Humphries R (2012) Rapid Detection of Campylobacter Antigen by Enzyme Immunoassay Leads to Increased Positivity Rates. *Journal of Clinical Microbiology* 51: 618-620. doi:10.1128/jcm.02565-12.
7. Granato P, Chen L, Holiday I, Rawling R, Novak-Weekley S et al. (2010) Comparison of Premier CAMPY Enzyme Immunoassay (EIA), ProSpecT Campylobacter EIA, and ImmunoCard STAT! CAMPY Tests with Culture for Laboratory Diagnosis of Campylobacter Enteric Infections. *Journal of Clinical Microbiology* 48: 4022-4027. doi:10.1128/jcm.00486-10.
8. Gilbert M, Mandrell R, Parker C, Li J, Vinogradov E (2007) Structural Analysis of the Capsular Polysaccharide from Campylobacter jejuni RM1221. *ChemBioChem* 8: 625-631. doi:10.1002/cbic.200600508.
9. Quinones B, Miller W, Bates A, Mandrell R (2008) Autoinducer-2 Production in Campylobacter jejuni Contributes to Chicken Colonization. *Applied and Environmental Microbiology* 75: 281-285. doi:10.1128/aem.01803-08.
10. Miller M, Bassler B (2001) Quorum Sensing in Bacteria. *Annual Review of Microbiology* 55: 165-199. doi:10.1146/annurev.micro.55.1.165.
11. Seo J, Song K, Jang K, Kim C, Jung B et al. (2000) Molecular cloning of a gene encoding the thermoactive levansucrase from *Rahnella aquatilis* and its growth phase-dependent expression in *Escherichia coli*. *Journal of Biotechnology* 81: 63-72. doi:10.1016/s0168-1656(00)00281-9.
12. Xue T, Zhao L, Sun H, Zhou X, Sun B (2009) LsrR-binding site recognition and regulatory characteristics in *Escherichia coli* AI-2 quorum sensing. *Cell Research* 19: 1258-1268. doi:10.1038/cr.2009.91.

13. Hoffmann J, Altenbuchner J (2015) Functional Characterization of the Mannitol Promoter of *Pseudomonas fluorescens* DSM 50106 and Its Application for a Mannitol-Inducible Expression System for *Pseudomonas putida* KT2440. *PLOS ONE* 10: e0133248. doi:10.1371/journal.pone.0133248.
14. Liu Y, Rainey P, Zhang X (2015) Molecular mechanisms of xylose utilization by *Pseudomonas fluorescens*: overlapping genetic responses to xylose, xylulose, ribose and mannitol. *Molecular Microbiology* 98: 553-570. doi:10.1111/mmi.13142.
15. Schleif R (2000) Regulation of the L-arabinose operon of *Escherichia coli*. *Trends in Genetics* 16: 559-565. doi:10.1016/s0168-9525(00)02153-3.
16. Tang S, Fazelinia H, Cirino P (2008) AraC Regulatory Protein Mutants with Altered Effector Specificity. *Journal of the American Chemical Society* 130: 5267-5271. doi:10.1021/ja7109053.
17. Tang S, Cirino P (2010) Design and Application of a Mevalonate-Responsive Regulatory Protein. *Angewandte Chemie* 123: 1116-1118. doi:10.1002/ange.201006083.
18. Frei C, Wang Z, Qian S, Deutsch S, Sutter M et al. (2016) Analysis of amino acid substitutions in AraC variants that respond to triacetic acid lactone. *Protein Science* 25: 804-814. doi:10.1002/pro.2873.
19. Miyada C, Horwitz A, Cass L, Timko J, Wilcox G (1980) DNA sequence of the *araC* regulatory gene from *Escherichia coli* B/r. *Nucleic Acids Research* 8: 5267-5274. doi:10.1093/nar/8.22.5267.
20. Hamilton E, Lee N (1988) Three binding sites for AraC protein are required for autoregulation of *araC* in *Escherichia coli*. *Proceedings of the National Academy of Sciences* 85: 1749-1753. doi:10.1073/pnas.85.6.1749.
21. Gondo S, Osaki T, Morishita M (1981) Glucose sensor with immobilized glucose oxidase-glucose isomerase membrane. *Journal of Molecular Catalysis* 12: 365-374. doi:10.1016/0304-5102(81)85041-9.
22. Tewari Y, Steckler D, Goldberg R (1985) Thermodynamics of the conversion of aqueous xylose to xylulose. *Biophysical Chemistry* 22: 181-185. doi:10.1016/0301-4622(85)80041-7.
